# Supplementary material
Source: PubMed Central journal article supplement (PMC8011940)
Supplement: NIHMS1679895-supplement-Supplementary_Figures.pdf [file NIHMS1679895-supplement-Supplementary_Figures.pdf]

Figure S1

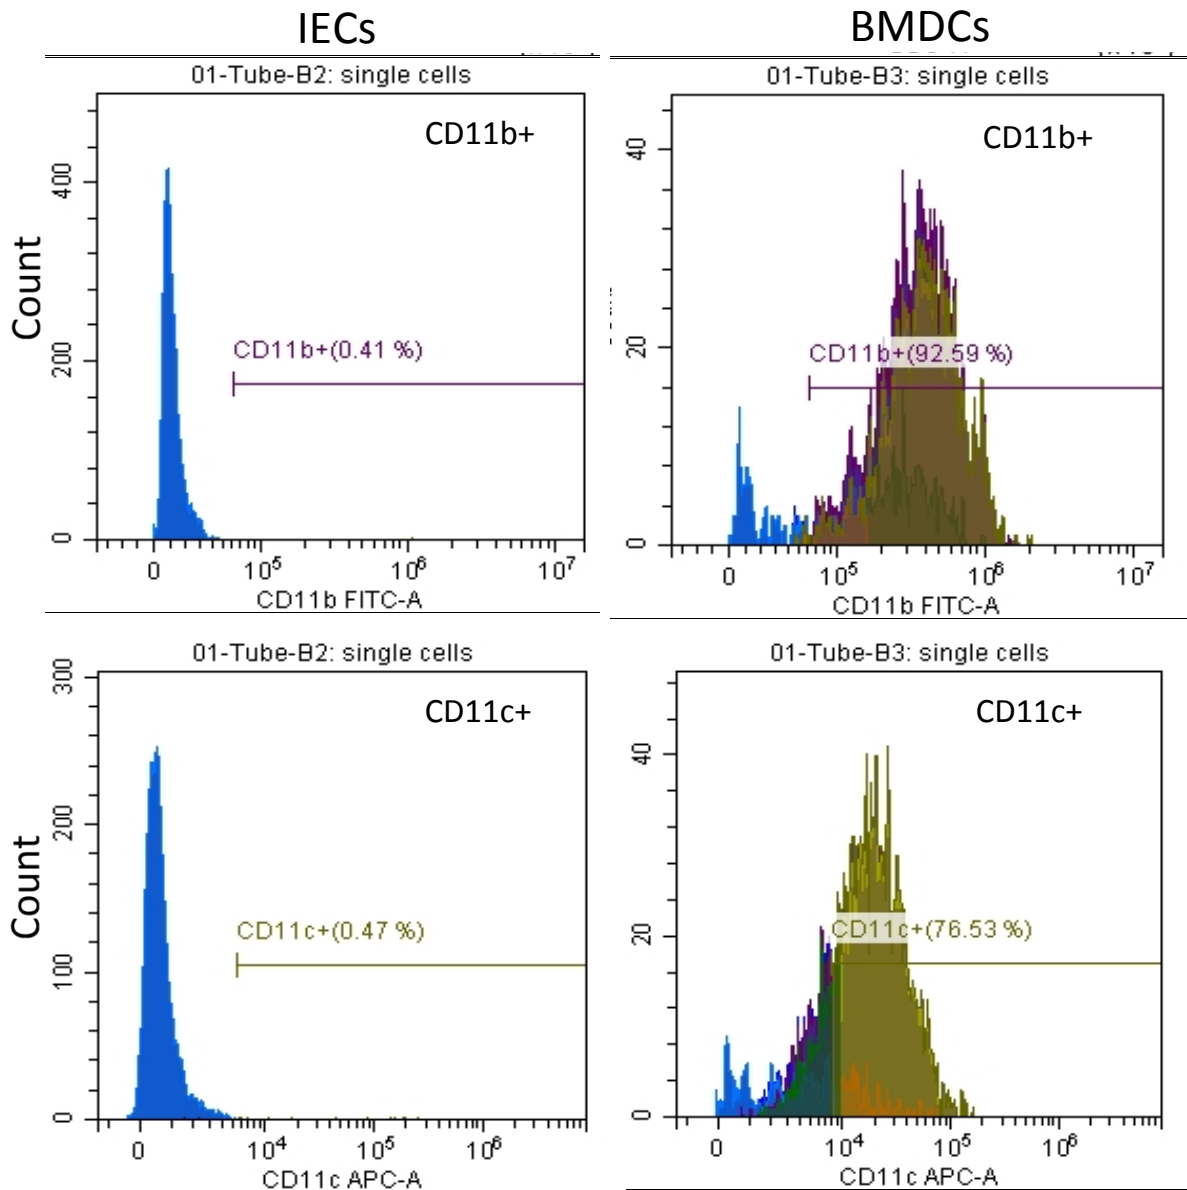

**Figure S1** Validation of primary Bone-Marrow Dendritic Cells (BMDC). Intestinal Epithelial cells (IECs) from mice were used as negative control. Compared to negative control cells, BMDCs are approximately 92% CD11b positive and 76% CD11c positive.

Figure S2

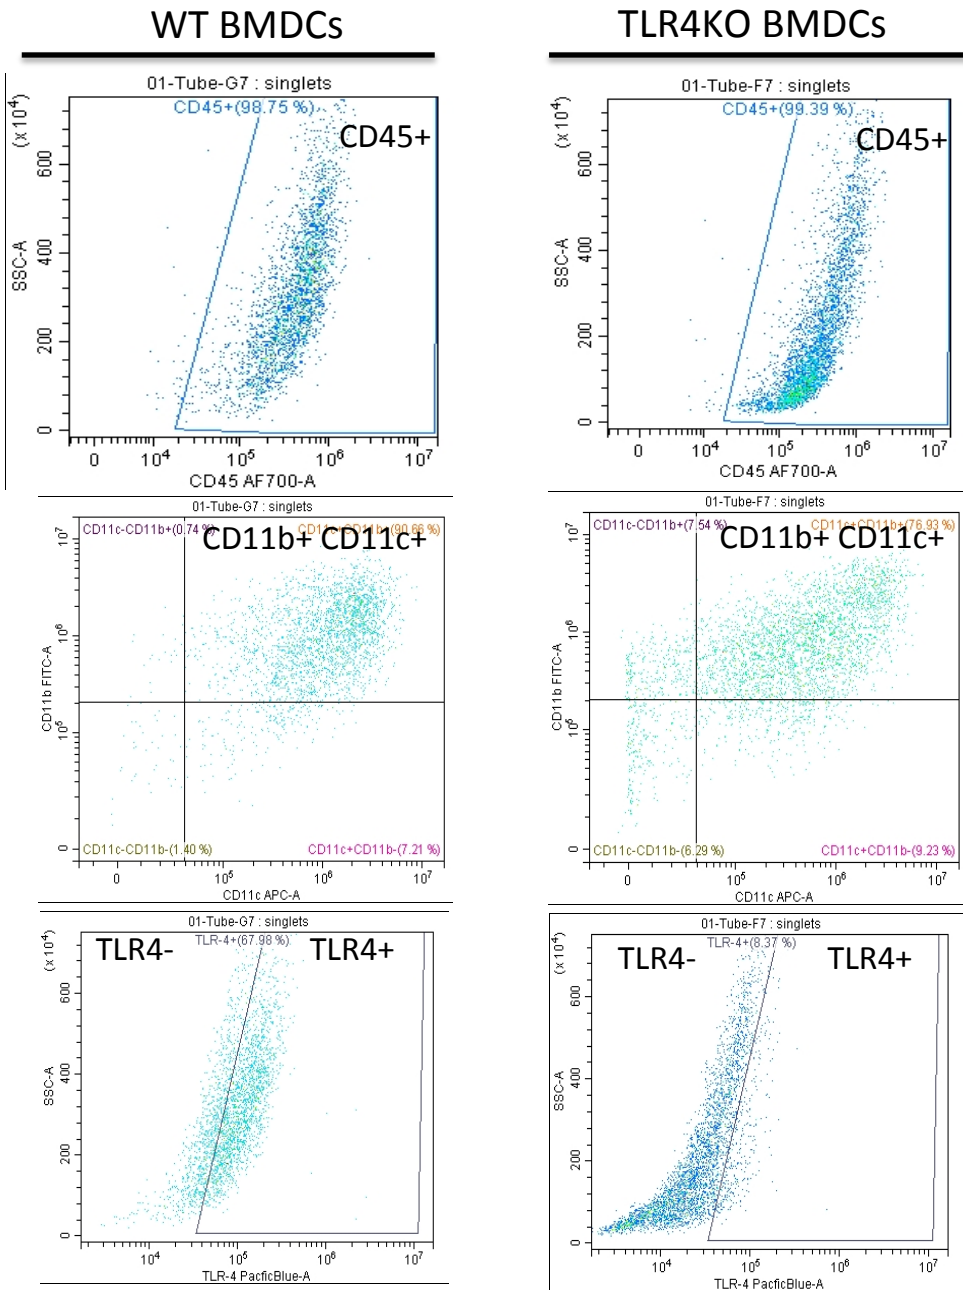

**Figure S2** Validation of WT and TLR4KO Bone-Marrow Dendritic Cells. BMDCs are CD45/CD11b/CD11c positive. WT BMDCs is 68% TLR4 positive compared to TLR4KO cells.

# Figure S3

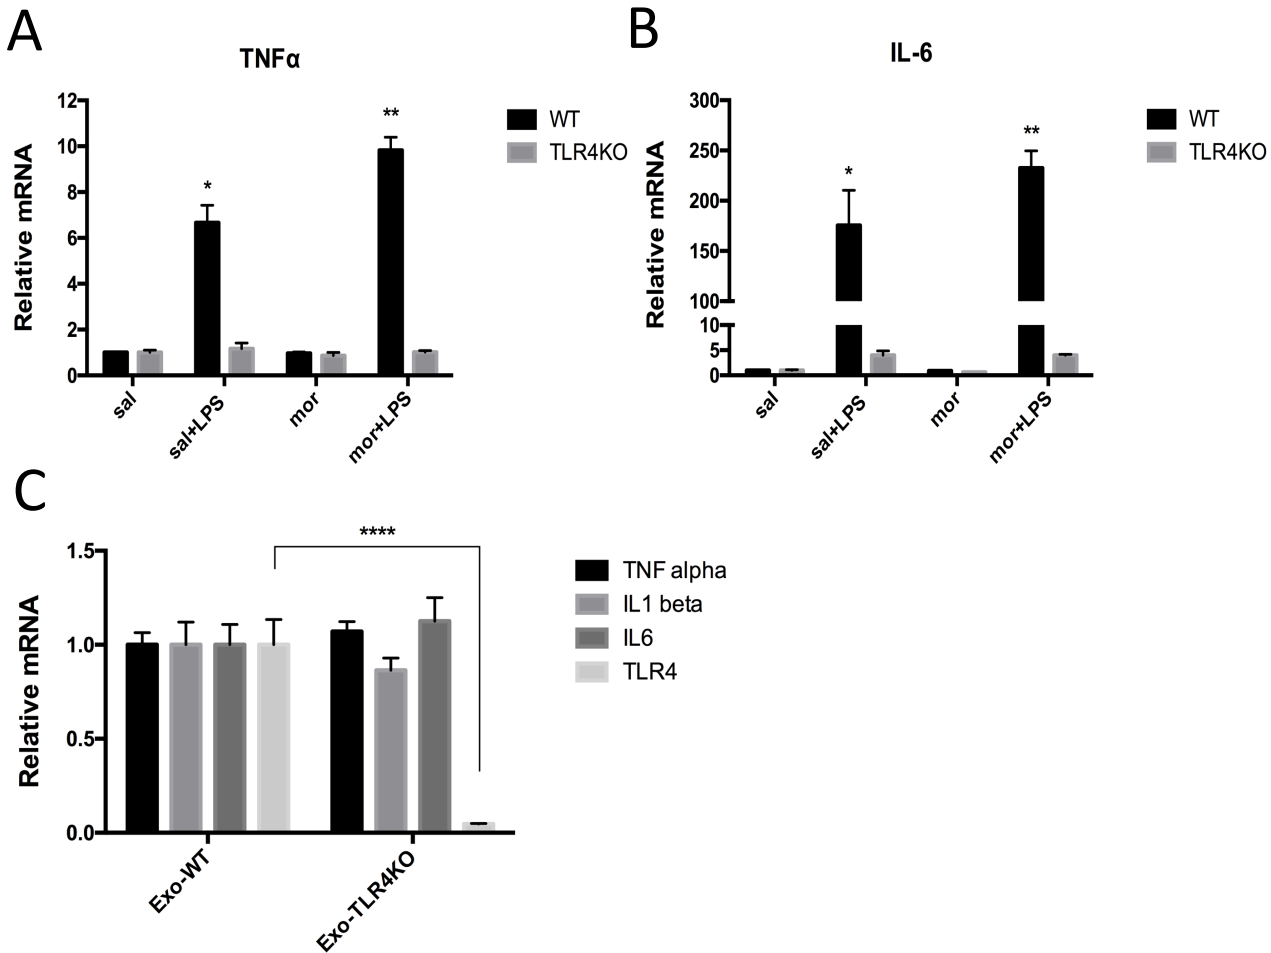

**Figure S3** Real-time PCR Validation of WT or TLR4KO BMDCs and secreted exosomes. (A-B) TLR4KO BMDCs do not respond to LPS stimulation compared to WT. (C) RNA extracted from WT and TLR4KO BMDC exosomes do not show any difference in TNF $\alpha$  and IL-6 levels, but have significant differences in TLR4 mRNA level.

# Figure S4

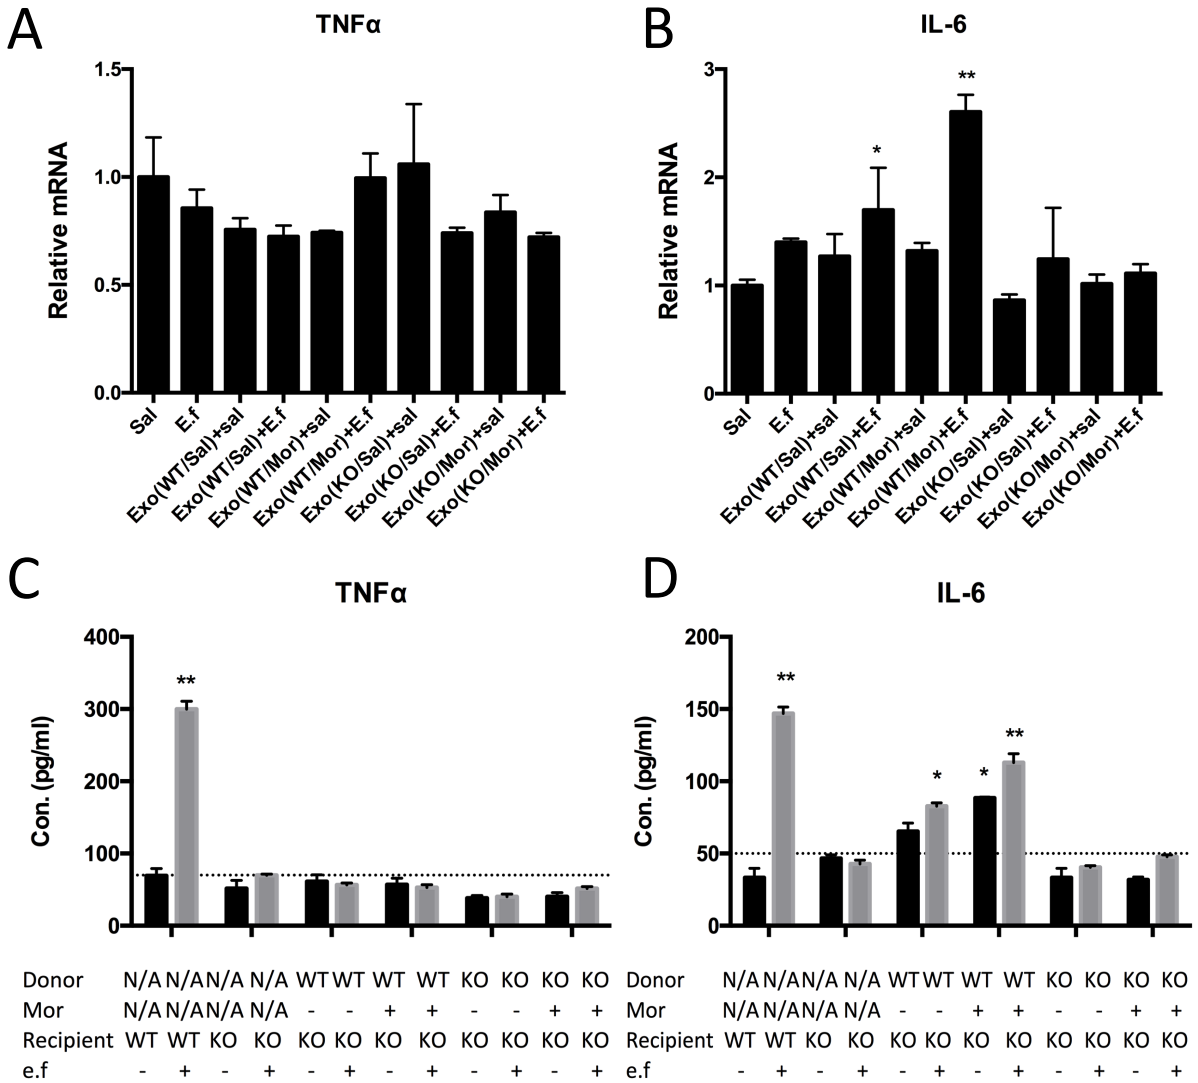

**Figure S4** Quantification of cytokine in WT and TLR2KO BMDCs. (A-B) In TLR2KO BMDCs, treatment of heat-deactivated **Enterococcus faecalis** (E.f.) does not stimulate cytokine production. After incubation of exosome from WT BMDC and E.f. stimulation for 4 hours with E.f, real-time PCR showed that IL-6 level were significantly increased, but no difference was observed in TNF $\alpha$  mRNA. (C-D) IL-6 but not TNF $\alpha$  in the supernatant was also increased as determined by ELISA. (The results are expressed as the mean  $\pm$  SEM from triplicates per group, \* $p < 0.05$ , \*\* $p < 0.01$ )
